# Supplementary material for: Application of Herbaceous plant CSR strategy responses to four kinds of habitats in the Qinling Mountain for plant community design
Source: Research Square preprint supplement (doi:10.21203/rs.3.rs-3991265/v1), 2024-03-13
Supplement: Supplementary file 1 [file 80a9c0f3ae78358b1123876d.xlsx]

## Sheet: Sheet1
Number	Specis	CSR proportion			C:S:R	CSR stragety	plant traits
		C(%)	S(%)	R(%)			LA(mm2)	LDMC(%)	SLA(mm2mg-1)
1	Cardamine occulta Hornem.	0.69659	22.035	77.2684	1 : 22 : 77 %	R/SR	29.4	19.2308	29.4
2	Stellaria media (L.) Vill.	0	0	100	0 : 0 : 100 %	R	10.84	4.62963	54.2
3	Plantago major Linn.	19.899	0	80.101	20 : 0 : 80 %	R/CR	266.9	15.1657	27.5155
4	Stylophorum sutchuenense (Franch.) Fedde	41.0801	0	58.9199	41 : 0 : 59 %	CR	2210.6	9.49384	38.5659
5	Allium ramosum L.	9.4593	77.4945	13.0462	9 : 77 : 13 %	S/SR	875.6	7.52351	21.4608
6	Bromus catharticus Vahl.	46.7463	22.5045	30.7493	47 : 23 : 31 %	C/CSR	2194.96	20.5836	18.1552
7	Dipsacus asper Wall.	44.5966	0	55.4034	45 : 0 : 55 %	CR	2148.1	9.28763	31.0868
8	Corydalis racemosa (Thunb.) Pers.	46.1816	0	53.8184	46 : 0 : 54 %	CR	1694.3	11.6661	25.3638
9	Sinosenecio oldhamianus (Maxim.) B. Nord.	26.9066	0	73.0934	27 : 0 : 73 %	R/CR	1034.8	4.60661	51.2277
10	Artemisia absinthium Linn.	43.447	0	56.553	43 : 0 : 57 %	CR	1474.66	11.3208	26.1557
11	Allium macrostemon Bunge.	35.5777	0	64.4223	36 : 0 : 64 %	R/CR	358.58	10.9763	17.2394
12	Phedimus aizoon (L.) 't Hart	10.0517	0	89.9483	10 : 0 : 90 %	R	67.15	12.2993	18.6528
13	Glechoma biondiana (Diels) C. Y. Wu et C. Chen.	33.8302	0	66.1698	34 : 0 : 66 %	R/CR	791.6	12.9939	26.7432
14	Orychophragmus violaceus (L.) O. E. Schulz.	27.4622	0	72.5378	27 : 0 : 73 %	R/CR	605.24	11.043	31.688
15	Viola acuminata Ledeb.	37.0648	6.73209	56.2031	37 : 7 : 56 %	CR	1358.08	41.5049	11.6794
16	Erigeron annuus (L.) Desf.	25.6853	0	74.3147	26 : 0 : 74 %	R/CR	391.44	14.6013	25.7526
17	Crassocephalum crepidioides (Benth.) S. Moore	37.0934	0	62.9066	37 : 0 : 63 %	R/CR	1113.4	12.7103	28.3452
18	Lysimachia ciliata L.	22.18	0	77.82	22 : 0 : 78 %	R/CR	469.66	11.9307	37.0394
19	Caltha palustris Linn.	31.6317	0	68.3683	32 : 0 : 68 %	R/CR	1246.67	8.08366	43.5897
20	Geranium carolinianum Linn.	27.8007	18.6774	53.5219	28 : 19 : 54 %	R/CSR	690.86	46.9515	12.0907
21	Carex minxianica Y.C.Yang	24.4228	69.3554	6.22178	24 : 69 : 6 %	S/CS	1449.4	44.8414	11.7837
22	Corydalis DC.	33.2679	0	66.7321	33 : 0 : 67 %	R/CR	506.8	12.0154	21.6027
23	Artemisia indica Willd.	33.1944	0	66.8056	33 : 0 : 67 %	R/CR	935.26	10.0256	31.469
24	Corydalis incisa (Thunb.) Pers.	34.1964	0	65.8036	34 : 0 : 66 %	R/CR	1207.78	10.1616	35.9672
25	Duchesnea chrysantha (Zoll. et Mor.) Miq.	41.9958	0	58.0042	42 : 0 : 58 %	CR	574.3	16.1067	17.6166
26	Silene firma Sieb. et Zucc.	37.2002	0	62.7998	37 : 0 : 63 %	R/CR	1452.76	7.63762	34.8551
27	Rumexchalepensis Mill	42.3264	0	57.6736	42 : 0 : 58 %	CR	2148.62	7.32287	35.2117
28	Picris hieracioides Boiss.	37.0594	0	62.9406	37 : 0 : 63 %	R/CR	1680.48	8.11756	39.3555
29	Rumex acetosa Linn.	12.8617	69.8778	17.2605	13 : 70 : 17 %	S/SR	2038.6	5.28175	33.2561
30	Carex lanceolata Boott	12.4968	75.7388	11.7643	12 : 76 : 12 %	S/CS	684.82	61.1126	15.2793
31	Stellaria vestita Kurz	18.8171	6.98568	74.1972	19 : 7 : 74 %	R/CR	265.76	17.338	26.8444
32	Sedum lineare Thunb.	0.465263	78.291	21.2438	0 : 78 : 21 %	S/SR	40.26	3.56379	40.26
33	Cardamine engleriana O. E. Schulz	18.1496	0	81.8504	18 : 0 : 82 %	R/CR	415.725	6.72334	47.7845
34	Silene fortunei Regel	12.967	0	87.033	13 : 0 : 87 %	R	214.88	10.8319	42.976
35	Liriope spicata (Thunb.) Lour.	33.4806	66.5194	0	33 : 67 : 0 %	S/CS	2723.22	44.7617	8.72156
36	Carex giraldiana Kükenth.	28.253	71.747	0	28 : 72 : 0 %	S/CS	1659.52	43.4649	8.13012
37	Liriope longipedicellata Wang et Tang	22.9345	77.0655	0	23 : 77 : 0 %	S/CS	935.72	41.4508	6.94463
38	Carex ascotreta C.B. Clarke	39.6595	14.2837	46.0568	40 : 14 : 46 %	CR/CSR	1936.3	19.2725	27.2718
39	Avena fatua Linn.	29.9385	25.2164	44.8451	30 : 25 : 45 %	R/CSR	1126.72	21.4741	25.7477
40	Erodium cicutarium (L.) L'Hér.	71.4196	0	28.5804	71 : 0 : 29 %	C/CR	3269.64	14.563	15.6099
41	Euphorbia amygdaloides L.	29.1607	0	70.8393	29 : 0 : 71 %	R/CR	661.02	15.7564	30.6311
42	Geranium nepalense Sweet	46.5438	0	53.4562	47 : 0 : 53 %	CR	2369.94	9.55392	30.5169
43	Lolium multiflorum Lamk.	53.5233	45.8525	0.62421	54 : 46 : 1 %	CS	5065.8	30.5341	9.92477
44	Dichocarpum fargesii (Franch.) W. T. Wang & P. K. Hsiao	16.8861	0	83.1139	17 : 0 : 83 %	R/CR	296.8	11.4583	38.5455
45	Chrysosplenium sinicum Maxim.	13.5754	0	86.4246	14 : 0 : 86 %	R	154.76	8.28475	28.6593
46	Cnidium monnieri (Linn.) Cuss.	51.4051	0	48.5949	51 : 0 : 49 %	CR	4174.42	9.31241	35.2093
47	Cryptotaenia japonica Hassk.	36.5031	0	63.4969	37 : 0 : 63 %	R/CR	1504.26	8.26274	37.2526
48	Dipsacus asper Wall.	49.986	0	50.014	50 : 0 : 50 %	CR	3238.62	7.15138	31.7886
49	Chrysosplenium griffithii Hook. f. et Thoms.	3.09542	0	96.9046	3 : 0 : 97 %	R	46.7	12.0983	36.4844
50	Carpesium abrotanoides Linn.	42.5855	0	57.4145	43 : 0 : 57 %	CR	2828.42	5.50882	43.0243
51	Glechoma longituba (Nakai) Kupr.	30.6342	26.0114	43.3545	31 : 26 : 43 %	CSR	609.86	19.8381	18.3031
52	Corydalis humosa MIgo	2.7912	0	97.2088	3 : 0 : 97 %	R	46.7	9.85663	42.4545
53	Urtica laetevirens Maxim.	43.1418	0	56.8582	43 : 0 : 57 %	CR	1173.96	14.4792	23.367
54	Hylomecon japonica (Thunb.) Prantl & Kündig	22.6677	0	77.3323	23 : 0 : 77 %	R/CR	406.6	15.743	31.6667
55	Corydalis acuminata Franch.	47.9085	0	52.0915	48 : 0 : 52 %	CR	2753.68	10.9266	31.5572
56	Patrinia heterophylla Bunge	42.2194	0	57.7806	42 : 0 : 58 %	CR	962.94	12.0939	21.8453
57	Eutrema wasabi (Siebold) Maxim	7.85415	77.6906	14.4553	8 : 78 : 14 %	S/SR	199.66	43.3251	14.2411
58	Stylophorum diphyllum (Michx.) Nutt.	37.1862	0	62.8138	37 : 0 : 63 %	R/CR	1674.42	8.78878	38.94
59	Euphorbia esula Linn.	29.4749	0	70.5251	29 : 0 : 71 %	R/CR	494.9	16.3383	24.8693
60	Artemisia lavandulifolia DC.	34.607	0	65.393	35 : 0 : 65 %	R/CR	394.26	16.3639	18.389
61	Scutellaria indica L.	32.7294	0	67.2706	33 : 0 : 67 %	R/CR	545.92	12.5993	22.9378
62	Hemerocallis fulva (Linn.) Linn.	56.0468	0	43.9532	56 : 0 : 44 %	CR	5703.78	7.77985	34.3643
63	Carex dimorpholepis Steud.	34.2666	18.5479	47.1855	34 : 19 : 47 %	CR/CSR	1092.2	19.5102	23.3976
64	Notoseris melanantha (Franch.) C. Shih	40.9609	0	59.0391	41 : 0 : 59 %	CR	2209.84	9.62722	38.8236
65	Trigonotis peduncularis (Trev.) Benth. ex Baker et Moore	1.57096	89.5076	8.92141	2 : 90 : 9 %	S	80.68	3.73157	16.2661
66	Galium aparine var. tenerum (Gren. et Godr.) Rchb.	0	96.6522	3.34783	0 : 97 : 3 %	S	7.68	12.6866	11.2941
67	Poa pratensis Linn.	6.64998	54.5167	38.8333	7 : 55 : 39 %	SR	69.28	22.2546	15.1266
68	Viola philippica Cav.	2.21318	89.1265	8.66036	2 : 89 : 9 %	S	101.32	8.18339	15.259
69	Cardamine leucantha (Tausch) O. E. Schulz	10.2398	83.504	6.25615	10 : 84 : 6 %	S	825.34	11.1827	13.5124
70	Carex pediformis C. A. Mey.	13.3446	14.2628	72.3926	13 : 14 : 72 %	R/SR	255.56	18.8025	38.0298
71	Thalictrum aquilegiifolium var. sibiricum Regel et Tiling	26.9008	17.0291	56.0701	27 : 17 : 56 %	R/CSR	1042.88	19.9563	35.6662
72	Leibnitzia anandria (L.) Turcz.	19.3773	0	80.6227	19 : 0 : 81 %	R/CR	238.6	26.928	9.43829
73	Potentilla multicaulis Bunge	32.723	1.33387	65.9431	33 : 1 : 66 %	R/CR	619.5	16.7211	24.1992
74	Nepeta cataria Linn.	27.9924	0	72.0076	28 : 0 : 72 %	R/CR	500.4	15.736	26.9032
75	Incarvillea sinensis Lam.	36.2215	0	63.7785	36 : 0 : 64 %	R/CR	965.6	12.974	27.6676
76	Artemisia gmelinii var. incana (Bess.) H. C. Fu	23.4973	20.2234	56.2793	23 : 20 : 56 %	R/CSR	501.32	19.4661	25.0911
77	Viola dissecta Ledeb.	34.5537	0	65.4463	35 : 0 : 65 %	R/CR	839.92	13.3223	27.359
78	Thalictrum macrorhynchum Franch.	19.0843	30.3176	50.5982	19 : 30 : 51 %	R/CSR	645.3	23.5079	33.4352
79	Geranium wilfordii Maxim.	27.5093	24.6985	47.7922	28 : 25 : 48 %	R/CSR	656.94	20.2271	21.9566
80	Potentilla reptans var. sericophylla Franch.	14.6079	39.1133	46.2788	15 : 39 : 46 %	SR/CSR	316.34	23.9807	24.4467
81	Rubia cordifolia Linn.	8.99415	23.9757	67.0302	9 : 24 : 67 %	R/SR	136.9	20.0893	30.4222
82	Chrysanthemum indicum L.	20.5613	0	79.4387	21 : 0 : 79 %	R/CR	322.02	12.4441	30.4367
83	Phedimus aizoon (L.) 't Hart	12.2316	0	87.7684	12 : 0 : 88 %	R	105.1	9.06931	22.9476
84	Viola acuminata Ledeb.	15.1991	41.6188	43.1821	15 : 42 : 43 %	SR/CSR	259.16	23.0035	19.9048
85	Silene aprica Turcz. ex Fisch. et Mey.	21.9128	0	78.0872	22 : 0 : 78 %	R/CR	275.76	12.4381	24.9331
86	Chasmanthium latifolium (Michx.) H. O. Yates	6.0863	75.1287	18.785	6 : 75 : 19 %	S/SR	142.74	41.4141	15.8248
87	Iris wilsonii C. H. Wright	17.5606	79.3639	3.07553	18 : 79 : 3 %	S/CS	2204.46	11.893	13.2368
88	Medicago ruthenica (L.) Trautv.	5.23994	56.0157	38.7443	5 : 56 : 39 %	SR	49.2	20.9302	13.6667
89	Pyrrosia petiolosa (Christ) Ching	29.8191	70.1809	0	30 : 70 : 0 %	S/CS	1045.16	33.1224	5.48525
90	Taraxacum officinale F. H. Wigg.	39.0085	0	60.9915	39 : 0 : 61 %	CR	1424.54	10.6035	31.2536
91	Anemone tomentosa (Maxim.) Pei	16.6677	80.5038	2.82852	17 : 81 : 3 %	S/CS	1977.5	12.0795	11.335
92	Sedum sarmentosum Bunge	0.870714	79.0703	20.059	1 : 79 : 20 %	S/SR	56.24	3.64583	36.5195
93	Carex breviculmis R.Br.	11.097	58.2331	30.6699	11 : 58 : 31 %	S/CSR	280.76	32.2279	20.3449
94	Saussurea mutabilis Diels	56.6596	0	43.3404	57 : 0 : 43 %	CR	3788.13	9.74543	26.0174
95	Polygonatum sibiricum Redouté	16.9943	0	83.0057	17 : 0 : 83 %	R/CR	415.4	10.0132	54.6579
96	Thlaspi arvense L.	16.7412	0	83.2588	17 : 0 : 83 %	R/CR	240.9	12.3477	32.12
97	Lysimachia christinae Hance	15.1346	0	84.8654	15 : 0 : 85 %	R	187.68	16.1817	29.6025
98	Macleaya microcarpa (Maxim.) Fedde	51.5728	0	48.4272	52 : 0 : 48 %	CR	3351.7	11.2456	30.1629
99	Leonurus japonicus Houtt.	53.2275	0	46.7725	53 : 0 : 47 %	CR	3189.12	13.0461	27.2284
100	Polygonatum odoratum (Mill.) Druce	28.3389	0	71.6611	28 : 0 : 72 %	R/CR	1070.84	10.9544	48.5422
101	Viola variegata Fischer ex Link	22.7481	0	77.2519	23 : 0 : 77 %	R/CR	311.2	16.4256	25.8472
102	Agrimonia pilosa var. pilosa	38.7188	33.3094	27.9718	39 : 33 : 28 %	CSR	2196.48	24.4401	19.3148
103	Gnaphalium pensylvanicum Willd.	16.9888	0	83.0112	17 : 0 : 83 %	R/CR	209.92	15.018	27.9893
104	Potentilla fragarioides Linn.	35.8697	34.7853	29.345	36 : 35 : 29 %	CSR	1195.3	22.5747	16.8305
105	Patrinia scabiosifolia Fisch. ex Trevir.	53.7639	0	46.2361	54 : 0 : 46 %	CR	2955.08	13.9569	25.5409
106	Argentina anserina (L.) Rydb.	39.7042	36.6593	23.6365	40 : 37 : 24 %	CS/CSR	1947.32	24.4696	16.4887
107	Vicia bungei Ohwi	38.0149	0	61.9851	38 : 0 : 62 %	CR	1047.2	16.0033	26.8513
108	Oplismenus undulatifolius (Ard.) Roem. & Schult.	22.227	6.12496	71.648	22 : 6 : 72 %	R/CR	637.32	17.5964	43.3551
109	Lysimachia barystachys Bunge	29.7428	0	70.2572	30 : 0 : 70 %	R/CR	1004.76	11.7139	41.1787
110	Polygala japonica Houtt.	2.14014	19.791	78.0689	2 : 20 : 78 %	R/SR	38.46	18.7013	26.7083
111	Plantago lanceolata Linn.	42.9888	0	57.0112	43 : 0 : 57 %	CR	1007.84	14.5808	21.7676
112	Vicia cracca Benth.	37.9095	0	62.0905	38 : 0 : 62 %	CR	847.3	16.5116	23.8676
113	Festuca ovina Linn.	38.5065	41.6024	19.8911	39 : 42 : 20 %	CS/CSR	2943.6	29.4203	17.3133
114	Lilium brownii F.E.Br. ex Miellez	46.4141	17.2028	36.3831	46 : 17 : 36 %	CR/CSR	2454.46	19.7907	21.4889
115	Lithospermum zollingeri DC.	31.7555	2.89276	65.3517	32 : 3 : 65 %	R/CR	702.92	16.9276	26.6459
116	Lithospermum L.	14.8844	0	85.1156	15 : 0 : 85 %	R	272.54	11.7692	43.9581
117	Carpesium macrocephalum Franch. et Savat.	68.7111	0	31.2889	69 : 0 : 31 %	C/CR	6943.24	11.5747	21.8588
118	Melica scabrosa Trin.	7.3948	64.6345	27.9707	7 : 65 : 28 %	S/SR	207.4	39.916	21.8316
119	Syneilesis aconitifolia (Bunge) Maxim.	90.1725	0	9.82748	90 : 0 : 10 %	C	19902.4	14.2368	13.3198
120	Corydalis jingyuanensis C. Y. Wu et H. Chuang	49.0836	0	50.9164	49 : 0 : 51 %	CR	2511.64	10.3519	28.2334
121	Cardamine tangutorum O. E. Schulz	47.2455	0	52.7545	47 : 0 : 53 %	CR	2547.56	10.4901	30.947
122	Sanicula serrata Wolff	37.6916	0	62.3084	38 : 0 : 62 %	CR	1176.58	9.27845	29.3265
123	Oxalis griffithii Edgeworth et Hook. f.	19.9673	0	80.0327	20 : 0 : 80 %	R/CR	473.84	9.78078	45.387
124	Heracleum moellendorffii Hance	34.4812	0	65.5188	34 : 0 : 66 %	R/CR	690.04	13.0607	24.383
125	Convallaria keiskei Miq	25.216	0	74.784	25 : 0 : 75 %	R/CR	582.58	16.0149	35.5665
126	Anaphalis sinica Hance	10.1705	21.293	68.5365	10 : 21 : 69 %	R/SR	98.64	18.5214	20.7227
127	Hypericum przewalskii Maxim.	1.35767	10.4883	88.1541	1 : 10 : 88 %	R	31.06	17.4026	23.1791
128	Fragaria orientalis Lozinsk.	27.9397	38.5883	33.472	28 : 39 : 33 %	CSR	467.4	21.2205	15.2745
129	Poa nemoralis Linn.	17.3207	0	82.6793	17 : 0 : 83 %	R/CR	288.06	15.5306	35.9177
130	Equisetum hyemale L	10.842	89.158	0	11 : 89 : 0 %	S	73.38	22.7614	9.31218
131	Carex agglomerata C.B.Clarke	9.98912	53.7506	36.2602	10 : 54 : 36 %	SR	206.5	28.5714	21.0714
132	Cardamine macrophylla Willd.	48.3689	0	51.6311	48 : 0 : 52 %	CR	3396.4	12.6125	35.639
133	Anaphalis margaritacea (L.) A.Gray	24.5722	0	75.4278	25 : 0 : 75 %	R/CR	651.48	9.91115	41.1288
134	Maianthemum henryi (Baker) LaFrankie	34.5267	0	65.4733	35 : 0 : 65 %	R/CR	1397.92	16.4231	39.6236
135	Saussurea ussuriensis Maxim.	48.9194	0	51.0806	49 : 0 : 51 %	CR	3028.46	10.2272	32.0133
136	Chloranthus quadrifolius (A. Gray) H. Ohba & S. Akiyama	20.7271	0	79.2729	21 : 0 : 79 %	R/CR	405.4	13.161	36.5225
137	Chelidonium majus Linn.	41.8296	0	58.1704	42 : 0 : 58 %	CR	2005.14	12.0576	34.3817
138	Thalictrum przewalskii Maxim.	26.7287	20.7944	52.4769	27 : 21 : 52 %	R/CSR	1192.7	21.224	36.5859
139	Galium hoffmeisteri (Klotzsch) Ehrend. & Schönb.-Tem. ex R.R.Mill	1.79057	0	98.2094	2 : 0 : 98 %	R	38.2	12.9032	47.75
140	Viola selkirkii Pursh ex Gold.	19.9979	0	80.0021	20 : 0 : 80 %	R/CR	321.18	13.0128	31.6433
141	Arisaema lobatum Engl.	61.9495	0	38.0505	62 : 0 : 38 %	CR	5354.3	9.99835	25.2026
142	Ajuga ciliata Bunge	42.7704	4.70531	52.5243	43 : 5 : 53 %	CR	2640.16	17.5064	35.714
143	Isodon japonicus (Burm. f.) H. Hara	46.7636	10.884	42.3524	47 : 11 : 42 %	CR/CSR	4375	19.3102	34.4217
144	Melissa officinalis Linn.	23.9724	28.5017	47.5258	24 : 29 : 48 %	R/CSR	892.96	22.7976	29.94
145	Boehmeria spicata (Gaudich.) Endl.	29.4022	16.3563	54.2414	29 : 16 : 54 %	R/CSR	1040.74	19.5066	30.61
146	Ranunculus japonicus Thunb.	41.0125	0	58.9875	41 : 0 : 59 %	CR	1227.3	16.5166	25.9884
147	Sanicula chinensis Bunge	74.708	0	25.292	75 : 0 : 25 %	C/CR	7629.1	16.4277	18.0485
148	Pinellia ternata (Thunb.) Makino	31.859	0	68.141	32 : 0 : 68 %	R/CR	1787.04	9.96185	60.8354
149	Corydalis edulis Maxim.	33.4106	0	66.5894	33 : 0 : 67 %	R/CR	2143.42	11.8849	64.6582
150	Clematis brevicaudata DC.	31.7323	0	68.2677	32 : 0 : 68 %	R/CR	6106.65	21.4822	29.2289
151	Delphinium anthriscifolium Hance var. calleryi (Franch.) Finet et Gagn.	38.6563	0	61.3437	39 : 0 : 61 %	CR	3367.86	15.2719	67.5373
152	Melica onoei Franch. et Sav.	17.5859	42.0911	40.323	18 : 42 : 40 %	SR/CSR	736.92	29.361	30.963
153	Artemisia dubia L. ex B.D.Jacks.	59.0295	0	40.9705	59 : 0 : 41 %	CR	6464.44	16.2756	32.0776
154	Achyranthes bidentata Blume	37.7522	0	62.2478	38 : 0 : 62 %	CR	2633.94	10.922	56.2207
155	Equisetum pratense Ehrh.	11.3825	0	88.6175	11 : 0 : 89 %	R	93.56	13.7931	22.2762
156	Primula malacoides Franch.	29.9784	0	70.0216	30 : 0 : 70 %	R/CR	590.46	14.225	27.1476
157	Geranium sibiricum Linn.	64.5574	0	35.4426	65 : 0 : 35 %	C/CR	3375.92	16.0645	18.8388
158	Carex heterostachya Bunge	23.9466	37.6616	38.3918	24 : 38 : 38 %	SR/CSR	1056.94	26.4354	26.5396
159	Deyeuxia pyramidalis (Host) Veldkamp	42.7085	34.3966	22.8949	43 : 34 : 23 %	CS/CSR	5507.3	30.2256	22.5894
160	Phragmites australis (Cav.) Trin. ex Steud.	50.6435	49.3565	0	51 : 49 : 0 %	CS	2221.6	25.8111	6.55533
161	Bidens bipinnata L.	40.0262	0	59.9738	40 : 0 : 60 %	CR	1031.55	15.1575	24.5024
162	Coreopsis tinctoria Nutt.	41.9169	0	58.0831	42 : 0 : 58 %	CR	2098.5	6.30316	35.3765
163	Lamium amplexicaule Linn.	23.3967	9.60631	66.997	23 : 10 : 67 %	R/CR	303.3	17.5063	21.8201
164	Thalictrum fargesii Franch. ex Finet et Gagnep.	15.871	34.0799	50.0492	16 : 34 : 50 %	SR/CSR	478	24.4966	32.7397
165	Viola hancockii W. Beck.	54.1321	0	45.8679	54 : 0 : 46 %	CR	742.6	12.9049	14.9116
166	Oxalis acetosella Linn.	20.3746	0	79.6254	20 : 0 : 80 %	R/CR	415.6	9.7561	38.4815
167	Cardamine impatiens L.	0	24.9623	75.0377	0 : 25 : 75 %	R/SR	12.9	20	32.25
168	Gypsophila oldhamiana Miq.	26.4288	0	73.5712	26 : 0 : 74 %	R/CR	247	14.527	19.1473
169	Thalictrum grandiflorum Maxim.	28.008	20.9079	51.084	28 : 21 : 51 %	R/CSR	1321.1	21.321	35.8995
170	Carex meihsienica K. T. Fu	31.8925	68.1075	0	32 : 68 : 0 %	S/CS	1679.6	37.754	9.51615
171	Polygonatum zanlanscianense Pamp.	19.8553	0	80.1447	20 : 0 : 80 %	R/CR	404	13.8814	39.2233
172	Hibiscus trionum Linn.	37.8037	16.9132	45.2831	38 : 17 : 45 %	CR/CSR	665.6	18.3145	17.1105
173	Lactuca serriola L.	9.79089	90.2091	0	10 : 90 : 0 %	S	683.9	10.7699	2.48601
174	Medicago sativa L.	24.3481	0	75.6519	24 : 0 : 76 %	R/CR	591.2	9.79449	38.3647
175	Saussurea sutchuenensis Franch.	55.2569	0	44.7431	55 : 0 : 45 %	CR	3746.3	9.30882	27.4053
176	Saussurea acromelaena Hand.-Mazz.	56.862	0	43.138	57 : 0 : 43 %	CR	4247.4	9.41958	27.4913
